# Supplementary material
Source: PubMed Central journal article supplement (PMC6611945)
Supplement: nty220_suppl_supplementary_figure_1.pdf [file nty220_suppl_supplementary_figure_1.pdf]

### Tobacco Advertisement Liking by Product Type

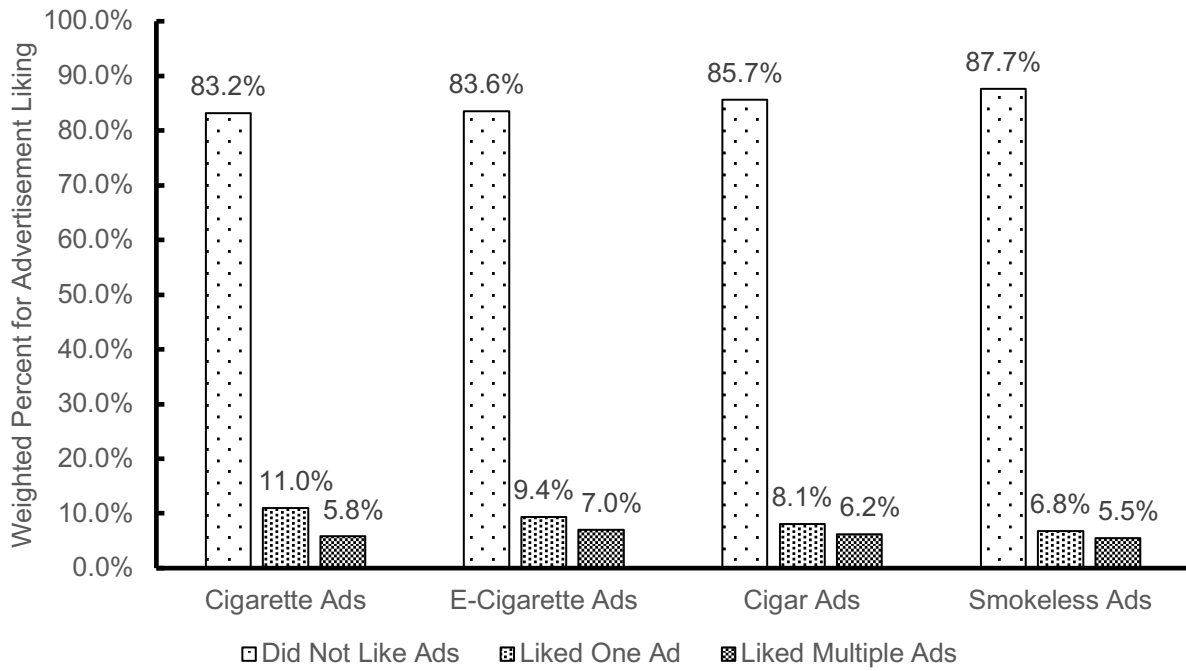

*Supplementary Figure 1.* Percentages are weighted and represent young adults who liked tobacco advertisements.
