# Supplementary material
Source: PubMed Central journal article supplement (PMC6611945)
Supplement: nty220_suppl_supplementary_figure_2.pdf [file nty220_suppl_supplementary_figure_2.pdf]

### 30-Day E-Cigarette Use: Ad Liking by Internalizing Symptoms

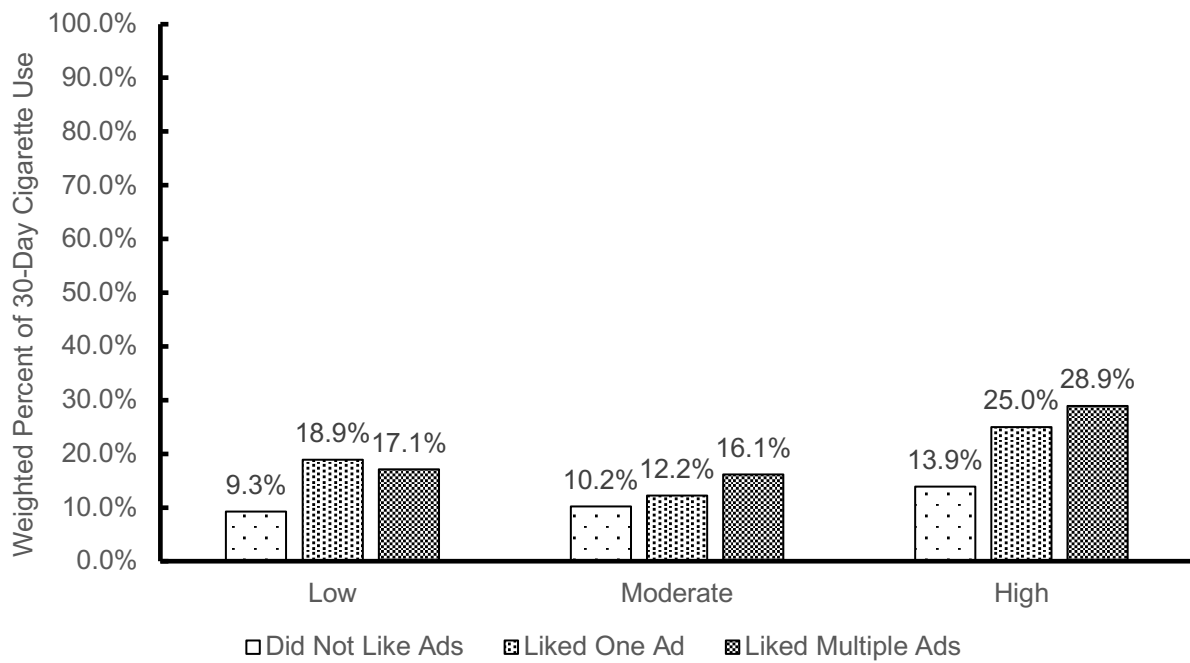

*Supplementary Figure 2.* Percentages are weighted and represent young adults who used e-cigarettes in the past 30-days considering advertisement liking and internalizing symptoms.
