# Supplementary material
Source: PubMed Central journal article supplement (PMC6611945)
Supplement: nty220_suppl_supplementary_figure_3.pdf [file nty220_suppl_supplementary_figure_3.pdf]

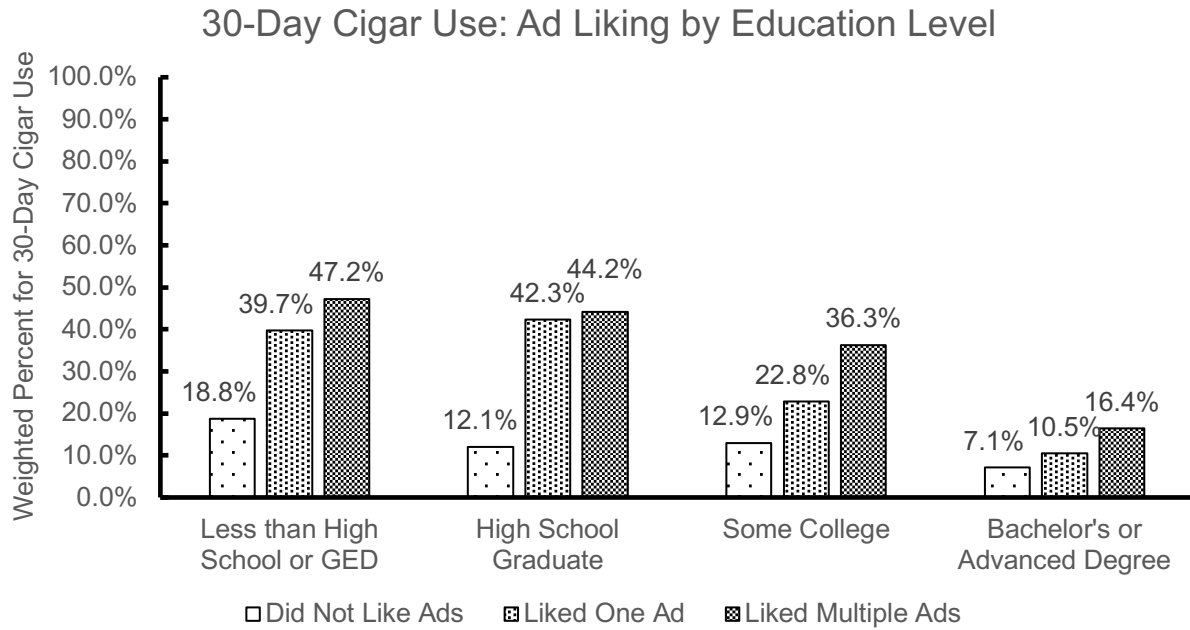

*Supplementary Figure 3.* Percentages are weighted and represent young adults who used cigars in the past 30-days considering advertisement liking and education.
