# Supplementary material
Source: PubMed Central journal article supplement (PMC6611945)
Supplement: nty220_suppl_supplementary_figure_4.pdf [file nty220_suppl_supplementary_figure_4.pdf]

### 30-Day Smokeless Tobacco Use: Ad Liking by Poverty Level

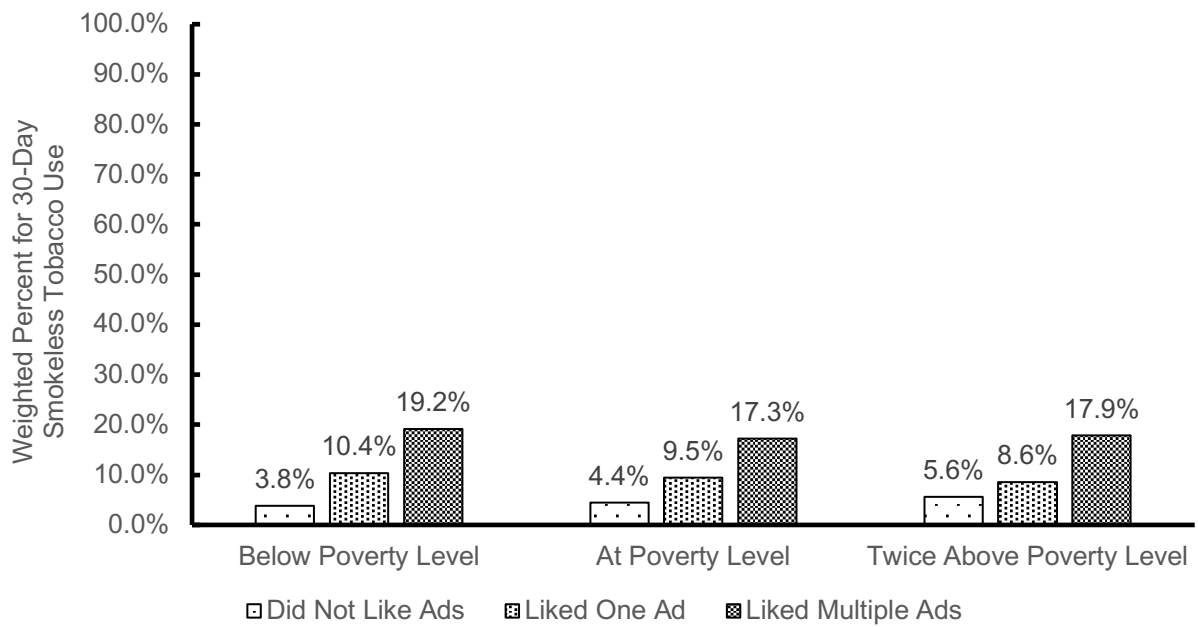

*Supplementary Figure 4.* Percentages are weighted and represent young adults who used smokeless tobacco in the past 30-days considering advertisement liking and poverty level.
