# Supplementary material
Source: PubMed Central journal article supplement (PMC6611945)
Supplement: nty220_suppl_supplementary_table_1.pdf [file nty220_suppl_supplementary_table_1.pdf]

Supplementary Table 1

*Ordinal Regression Predicting Tobacco Advertisement Liking among US Young Adults (18-24 Years)*

| Main Effects Model        | Cigarette Ads |        |                 | E-Cigarette Ads |        |                 | Cigar Ads |        |                 | Smokeless Ads |        |                 |
|---------------------------|---------------|--------|-----------------|-----------------|--------|-----------------|-----------|--------|-----------------|---------------|--------|-----------------|
| Variable                  | %/M OA        | %/M MA | aOR (95% CI)    | %/M OA          | %/M MA | aOR (95% CI)    | %/M OA    | %/M MA | aOR (95% CI)    | %/M OA        | %/M MA | aOR (95% CI)    |
| <b>Age</b>                | 21.3          | 21.2   | 1.05(1.01-1.09) | 21.1            | 21.3   | 0.99(0.96-1.04) | 21.1      | 21.2   | 1.01(0.97-1.06) | 21.1          | 21.1   | 0.98(0.94-1.02) |
| <b>Sex</b>                |               |        |                 |                 |        |                 |           |        |                 |               |        |                 |
| Female                    | 10.3%         | 5.6%   | Ref             | 9.6%            | 6.6%   | Ref             | 7.6%      | 5.4%   | Ref             | 6.2%          | 4.4%   | Ref             |
| Male                      | 11.6%         | 6.0%   | 1.19(1.05-1.34) | 9.2%            | 7.3%   | 1.14(0.98-1.33) | 8.5%      | 6.9%   | 1.37(1.19-1.57) | 7.5%          | 6.2%   | 1.36(1.17-1.58) |
| <b>Sexual Orientation</b> |               |        |                 |                 |        |                 |           |        |                 |               |        |                 |
| Straight                  | 10.3%         | 5.6%   | Ref             | 9.1%            | 6.3%   | Ref             | 7.7%      | 5.7%   | Ref             | 6.5%          | 5.4%   | Ref             |
| LGB                       | 17.9%         | 9.0%   | 1.88(1.58-2.24) | 12.4%           | 13.9%  | 1.90(1.56-2.31) | 11.2%     | 10.8%  | 1.64(1.32-2.03) | 10.8%         | 5.3%   | 1.16(0.91-1.49) |
| <b>Race/Ethnicity</b>     |               |        |                 |                 |        |                 |           |        |                 |               |        |                 |
| White                     | 11.7%         | 5.9%   | Ref             | 10.0%           | 6.7%   | Ref             | 8.0%      | 5.9%   | Ref             | 7.7%          | 6.5%   | Ref             |
| Hispanic                  | 9.0%          | 5.7%   | 0.83(0.70-0.99) | 8.3%            | 7.1%   | 1.00(0.85-1.16) | 8.0%      | 5.6%   | 1.07(0.91-1.25) | 5.9%          | 4.4%   | 0.82(0.67-1.00) |
| Black                     | 10.4%         | 5.2%   | 0.94(0.76-1.18) | 9.8%            | 5.0%   | 0.95(0.79-1.14) | 8.0%      | 8.2%   | 1.42(1.17-1.72) | 4.3%          | 2.9%   | 0.59(0.45-0.76) |
| Asian                     | 12.2%         | 6.7%   | 1.14(0.77-1.70) | 7.4%            | 11.5%  | 1.18(0.77-1.82) | 7.2%      | 6.2%   | 0.91(0.63-1.32) | X             | X      | X               |
| Multi                     | 11.9%         | 6.4%   | 0.97(0.73-1.27) | 9.8%            | 10.0%  | 1.21(0.92-1.59) | 11.9%     | 6.6%   | 1.31(1.01-1.69) | 7.3%          | 7.2%   | 1.08(0.75-1.56) |
| <b>Education</b>          |               |        |                 |                 |        |                 |           |        |                 |               |        |                 |
| < HS/GED                  | 10.8%         | 6.8%   | 0.97(0.76-1.24) | 7.7%            | 5.6%   | 0.52(0.39-0.68) | 7.6%      | 6.3%   | 0.72(0.53-0.96) | 4.4%          | 3.8%   | 0.46(0.32-0.65) |
| HS Graduate               | 9.4%          | 4.3%   | 0.71(0.57-0.89) | 7.7%            | 5.8%   | 0.54(0.42-0.69) | 6.4%      | 5.3%   | 0.66(0.50-0.88) | 5.8%          | 5.2%   | 0.64(0.48-0.85) |
| SC/A                      | 11.1%         | 6.5%   | 0.90(0.73-1.11) | 10.2%           | 7.3%   | 0.72(0.58-0.89) | 8.8%      | 6.5%   | 0.80(0.62-1.05) | 8.0%          | 5.4%   | 0.79(0.61-1.01) |
| B/A                       | 14.6%         | 5.9%   | Ref             | 12.6%           | 9.9%   | Ref             | 10.0%     | 6.7%   | Ref             | 8.6%          | 7.4%   | Ref             |
| <b>Poverty Level</b>      |               |        |                 |                 |        |                 |           |        |                 |               |        |                 |
| Below Poverty             | 10.8%         | 6.4%   | 1.03(0.88-1.20) | 9.1%            | 7.2%   | 1.04(0.89-1.22) | 8.2%      | 6.3%   | 1.00(0.84-1.18) | 6.2%          | 4.8%   | 0.83(0.69-1.00) |
| Near Poverty              | 12.5%         | 5.6%   | 1.02(0.84-1.24) | 11.5%           | 7.1%   | 1.11(0.92-1.35) | 8.8%      | 7.0%   | 1.08(0.88-1.33) | 5.9%          | 5.9%   | 0.83(0.66-1.06) |
| Twice Poverty             | 11.3%         | 6.1%   | Ref             | 9.6%            | 7.4%   | Ref             | 8.3%      | 6.5%   | Ref             | 8.6%          | 6.3%   | Ref             |
| <b>Military Service</b>   |               |        |                 |                 |        |                 |           |        |                 |               |        |                 |
| Never Served              | 10.9%         | 5.8%   | Ref             | 9.4%            | 6.9%   | Ref             | 8.1%      | 6.1%   | Ref             | 6.9%          | 5.3%   | Ref             |
| Served                    | 14.9%         | 7.9%   | 1.57(1.05-2.33) | 8.1%            | 8.0%   | 1.13(0.72-1.75) | 9.0%      | 8.7%   | 1.39(0.86-2.25) | 8.8%          | 9.3%   | 1.78(1.18-2.69) |
| <b>Internalizing</b>      |               |        |                 |                 |        |                 |           |        |                 |               |        |                 |
| Low                       | 8.6%          | 4.5%   | Ref             | 5.8%            | 5.0%   | Ref             | 5.8%      | 3.9%   | Ref             | 5.3%          | 4.4%   | Ref             |
| Moderate                  | 11.5%         | 5.9%   | 1.16(0.94-1.42) | 11.5%           | 6.9%   | 1.47(1.18-1.82) | 8.8%      | 6.4%   | 1.44(1.17-1.77) | 8.0%          | 5.3%   | 1.16(0.94-1.44) |
| High                      | 13.3%         | 7.3%   | 1.21(0.97-1.51) | 11.8%           | 9.4%   | 1.51(1.20-1.91) | 10.2%     | 8.5%   | 1.63(1.29-2.05) | 7.7%          | 6.5%   | 1.10(0.88-1.38) |
| <b>Externalizing</b>      |               |        |                 |                 |        |                 |           |        |                 |               |        |                 |
| Low                       | 8.1%          | 4.7%   | Ref             | 6.3%            | 5.1%   | Ref             | 5.6%      | 4.3%   | Ref             | 4.9%          | 3.9%   | Ref             |
| Moderate                  | 12.6%         | 6.0%   | 1.43(1.20-1.71) | 11.5%           | 7.9%   | 1.58(1.31-1.90) | 9.9%      | 6.6%   | 1.47(1.23-1.75) | 8.0%          | 6.3%   | 1.75(1.43-2.14) |
| High                      | 15.3%         | 8.2%   | 1.81(1.44-2.29) | 13.4%           | 10.2%  | 1.90(1.54-2.36) | 11.0%     | 10.2%  | 1.91(1.50-2.43) | 10.1%         | 7.1%   | 2.28(1.72-3.03) |

Note. Ads = Advertisements, OA = One Ad, MA = Multiple Ads, Ref = reference group, LGB = lesbian, gay, bisexual, or something else, HS = High School, SC/A = Some College or Associate Degree, B/A Bachelor's or Advanced Degree, M = mean, X = dropped from analysis (small cell sizes). Weighted percentages are those within the category (e.g., females) that liked ads. The remainder (i.e., those who did not like ads) would bring the total to 100%. Adjusted odds ratios have been adjusted for all covariates.
