# Supplementary material
Source: PubMed Central journal article supplement (PMC6611945)
Supplement: nty220_suppl_supplementary_table_2.pdf [file nty220_suppl_supplementary_table_2.pdf]

Supplementary Table 2. Modification of the effect of advertisement liking on 30-day e-cigarette use by poverty level among US young adults (18-24 years)

| Ad Liking          | Poverty Level |                 |       |                 |       |                 | Interactions  |               |
|--------------------|---------------|-----------------|-------|-----------------|-------|-----------------|---------------|---------------|
|                    | BPL           |                 | APL   |                 | TPL   |                 | BPL           | APL           |
|                    | % Use         | OR (95% CI)     | % Use | OR (95% CI)     | % Use | OR (95% CI)     | <i>Wald F</i> | <i>Wald F</i> |
| Did Not Like Ads   | 11.5          | Ref             | 12.4  | Ref             | 10.0  | Ref             | Ref           | Ref           |
| Liked One Ad       | 21.9          | 2.08(1.61-2.69) | 20.8  | 1.82(1.23-2.70) | 13.6  | 1.30(0.81-2.09) | 2.65          | 1.20          |
| Liked Multiple Ads | 29.1          | 2.88(2.13-3.89) | 16.4  | 1.29(0.74-2.25) | 15.2  | 1.53(0.95-2.46) | 5.28*         | 0.18          |

ORs are adjusted for age, sex, sexual orientation, ethnicity, poverty level, military service, internalizing symptoms, and externalizing symptoms

*Note:* Percentages are weighted. Percentages are those within each education level who used e-cigarettes. \* $p < .05$ , \*\* $p < .01$ , \*\*\* $p < .001$ . Ref = reference group. BPL = below poverty level, APL = at poverty level, TPL = twice poverty level
