# Supplementary material
Source: PubMed Central journal article supplement (PMC6611945)
Supplement: nty220_suppl_supplementary_table_3.pdf [file nty220_suppl_supplementary_table_3.pdf]

Supplementary Table 3. Modification of the effect of advertisement liking on 30-day e-cigarette use by internalizing symptoms among US young adults (18-24 years)

| Ad Liking          | Internalizing Symptoms |                 |          |                 |       |                 | Interactions  |               |
|--------------------|------------------------|-----------------|----------|-----------------|-------|-----------------|---------------|---------------|
|                    | Low                    |                 | Moderate |                 | High  |                 | Moderate      | High          |
|                    | % Use                  | OR (95% CI)     | % Use    | OR (95% CI)     | % Use | OR (95% CI)     | <i>Wald F</i> | <i>Wald F</i> |
| Did Not Like Ads   | 9.3                    | Ref             | 10.2     | Ref             | 13.9  | Ref             | Ref           | Ref           |
| Liked One Ad       | 18.9                   | 2.25(1.58-3.21) | 12.2     | 1.11(0.74-1.66) | 25.0  | 2.13(1.57-2.89) | 6.62*         | 0.04          |
| Liked Multiple Ads | 17.1                   | 2.16(1.35-3.48) | 16.1     | 1.54(1.02-2.31) | 28.9  | 2.37(1.76-3.21) | 1.17          | 0.11          |

ORs are adjusted for age, sex, sexual orientation, ethnicity, poverty level, military service, internalizing symptoms, and externalizing symptoms

*Note:* Percentages are weighted. Percentages are those within each education level who used e-cigarettes. \* $p < .05$ , \*\* $p < .01$ , \*\*\* $p < .001$ . Ref = reference group.
