# Supplementary material
Source: PubMed Central journal article supplement (PMC6611945)
Supplement: nty220_suppl_supplementary_table_4.pdf [file nty220_suppl_supplementary_table_4.pdf]

Supplementary Table 4. Modification of the effect of advertisement liking on 30-day cigar use by education level among US young adults (18-24 years)

|                    | Education Level |                 |       |                 |       |                 |       |                 | Interactions  |               |               |
|--------------------|-----------------|-----------------|-------|-----------------|-------|-----------------|-------|-----------------|---------------|---------------|---------------|
|                    | <HS/GED         |                 | HSG   |                 | SC/A  |                 | B/A   |                 | <HS/GED       | HSG           | SC/A          |
| Ad Liking          | % Use           | OR (95% CI)     | % Use | OR (95% CI)     | % Use | OR (95% CI)     | % Use | OR (95% CI)     | <i>Wald F</i> | <i>Wald F</i> | <i>Wald F</i> |
| Did Not Like Ads   | 18.8            | Ref             | 12.1  | Ref             | 12.9  | Ref             | 7.1   | Ref             | Ref           | Ref           | Ref           |
| Liked One Ad       | 39.7            | 2.32(1.50-3.61) | 42.3  | 4.58(3.35-6.25) | 22.8  | 1.73(1.28-2.35) | 10.5  | 1.30(0.64-2.66) | 1.93          | 9.27**        | 0.50          |
| Liked Multiple Ads | 47.2            | 3.35(2.25-4.98) | 44.2  | 4.87(3.23-7.35) | 36.3  | 3.10(2.34-4.11) | 16.4  | 1.94(0.93-4.05) | 1.55          | 4.95*         | 1.30          |

ORs are adjusted for age, sex, sexual orientation, ethnicity, poverty level, military service, internalizing symptoms, and externalizing symptoms

Note: Percentages are weighted. Percentages are those within each education level who used cigars. \* $p < .05$ , \*\* $p < .01$ , \*\*\* $p < .001$ . Ref = reference group. <HS/GED = Less than high school or GED, HSG = high school graduate, SC/A = some college or associate degree, B/A = bachelor's or advanced degree
